# Supplementary material for: Origin, Evolution and Diversity of φ29-like Phages—Review and Bioinformatic Analysis
Source: MDPI journal article supplement (doi:10.3390/ijms251910838), 2024-10-09
Supplement: s1 [file ijms-3229428 Figures S1-S9.pdf › ijms-3229428 Figures S1-S9.pdf]

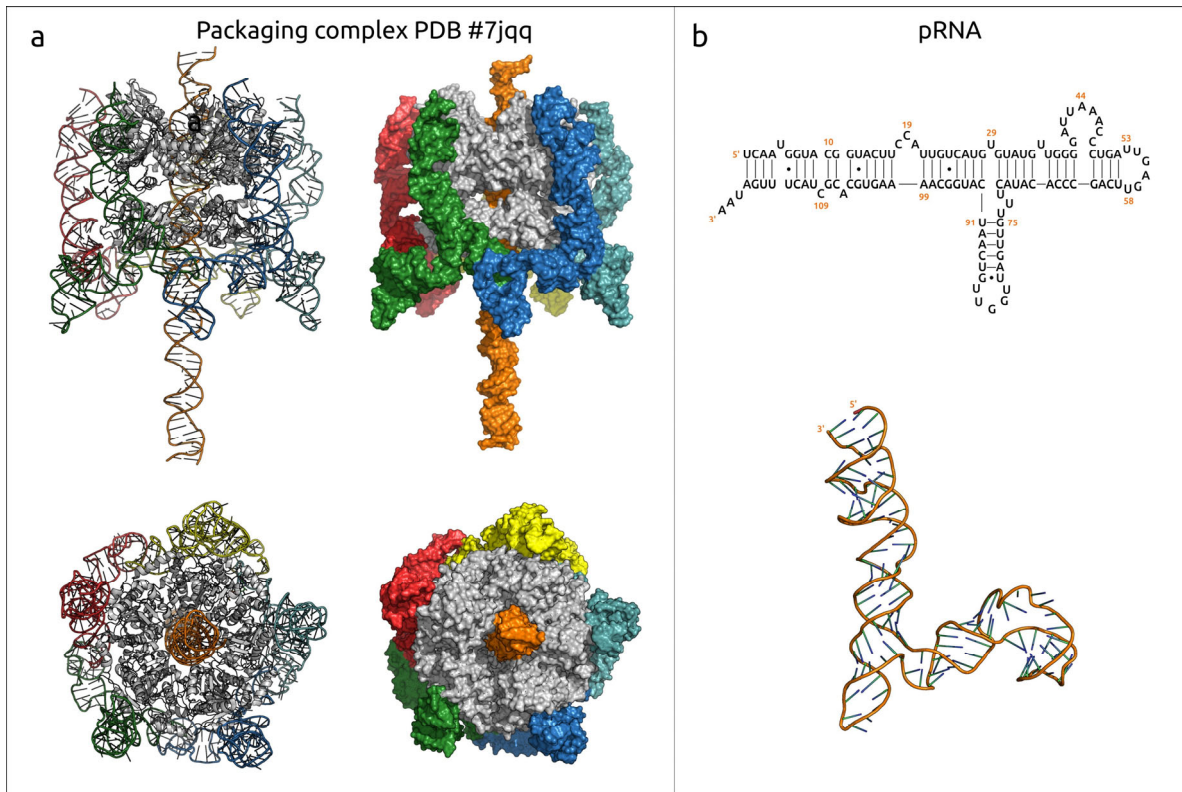

**Figure S1.** (a) Terminase (all monomers are coloured grey) and pRNA (each monomer has a different colour) in the  $\phi$ 29 packaging motor; ribbon and surface-rendered representations, including top view. Phage DNA is coloured orange. The image was made using PDB structure 7jqj [52]. (b) pRNA secondary structure, according to Ding et al. (2011) [150], and tertiary structure, based on PDB structure 7jqj [52].

|                                                                                                                                                                                                                                                                                                                                                                                                                                                           |                                                                                                               |                                                                                                                                                                                                                                                                                                 |
|-----------------------------------------------------------------------------------------------------------------------------------------------------------------------------------------------------------------------------------------------------------------------------------------------------------------------------------------------------------------------------------------------------------------------------------------------------------|---------------------------------------------------------------------------------------------------------------|-------------------------------------------------------------------------------------------------------------------------------------------------------------------------------------------------------------------------------------------------------------------------------------------------|
| <p>p0.2<br/>AF model</p> 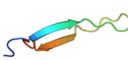                                                                                                                                                                                                                                                                                                                                                | <p>p0.4<br/>AF model</p>     | <p>p0.6<br/>AF model</p>                                                                                                                                                                                       |
| <p>p0.8<br/>AF model</p>                                                                                                                                                                                                                                                                                                                                                 | <p>p1<br/>AF model</p>       | <p>p3<br/>AF model</p>                                                                                                                                                                                        |
| <p>p2 DNA polymerase</p> <p>PDB #2pyl DNA polymerase complexed with primer-template DNA and incoming nucleotide substrates</p>  <p>ternary complex</p>  <p>DNA polymerase monomer</p>  <p>AF model</p> |                                                                                                               |                                                                                                                                                                                                                                                                                                 |
| <p>p4 transcription regulator</p> <p>PDB #2fio transcription regulator p4-DNA complex</p>  <p>ternary complex</p>  <p>DNA polymerase monomer</p>  <p>AF model</p>                                      |                                                                                                               |                                                                                                                                                                                                                                                                                                 |
| <p>p5<br/>AF model</p>                                                                                                                                                                                                                                                                                                                                                  | <p>p5.5<br/>AF model</p>   | <p>p14 holin<br/>AF model</p>                                                                                                                                                                                 |
| <p>p6 DNA-binding protein</p> <p>PDB #8pw4, p6 C-terminal delta20 truncated version</p>  <p>AF model</p>                                                                                                                                                                            |                                                                                                               | <p>p7 scaffolding protein</p> <p>PDB #9fzm, p7 scaffolding protein bound to intermediate-state MCP</p>  <p>AF model</p>  |
| <p>p13 tail lysin</p> <p>PDB #3cqs, p13 tail cell wall degrading enzyme</p>  <p>AF model</p>                                                                                                                                                                                        |                                                                                                               | <p>p15 endolysin</p> <p>AF model</p>                                                                                                                                                                         |
| <p>p16 terminase</p> <p>PDB #7jqs, genome packaging motor assembly</p>  <p>AF model</p>                                                                                                                                                                                             |                                                                                                               | <p>p16.6</p> <p>AF model</p>                                                                                                                                                                                 |
| <p>p16.7 replication organiser protein</p> <p>PDB #2c5r replication organiser protein p16.7 in complex with dsDNA</p>  <p>ternary complex</p>  <p>p16.7 monomer</p>  <p>AF model</p>             |                                                                                                               |                                                                                                                                                                                                                                                                                                 |
| <p>p16.8<br/>AF model</p>                                                                                                                                                                                                                                                                                                                                              | <p>p16.9<br/>AF model</p>  | <p>p17<br/>AF model</p>                                                                                                                                                                                      |

**Figure S2.** Experimentally derived structures and AF models of  $\phi$ 29 proteins. In ternary complexes, different components are distinguished with different colours. Separate monomers are shown using a rainbow colour gradient, where the N-terminal end is blue and the C-terminus is red.

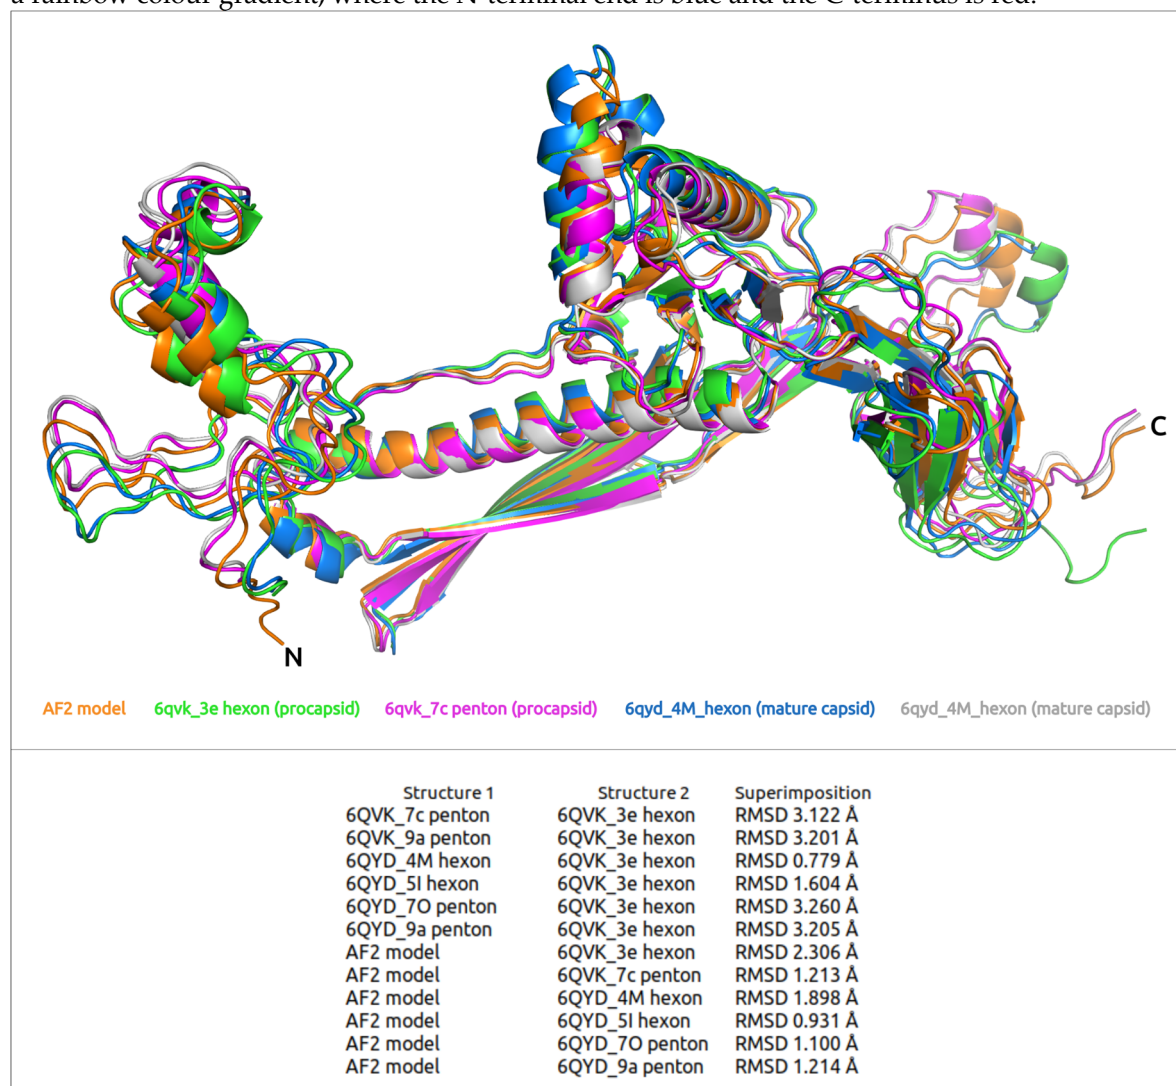

**Figure S3.** Superposition as predicted by AF and experimentally derived structures of major capsid protein. PDB codes, including chain numbers, are indicated in labels.



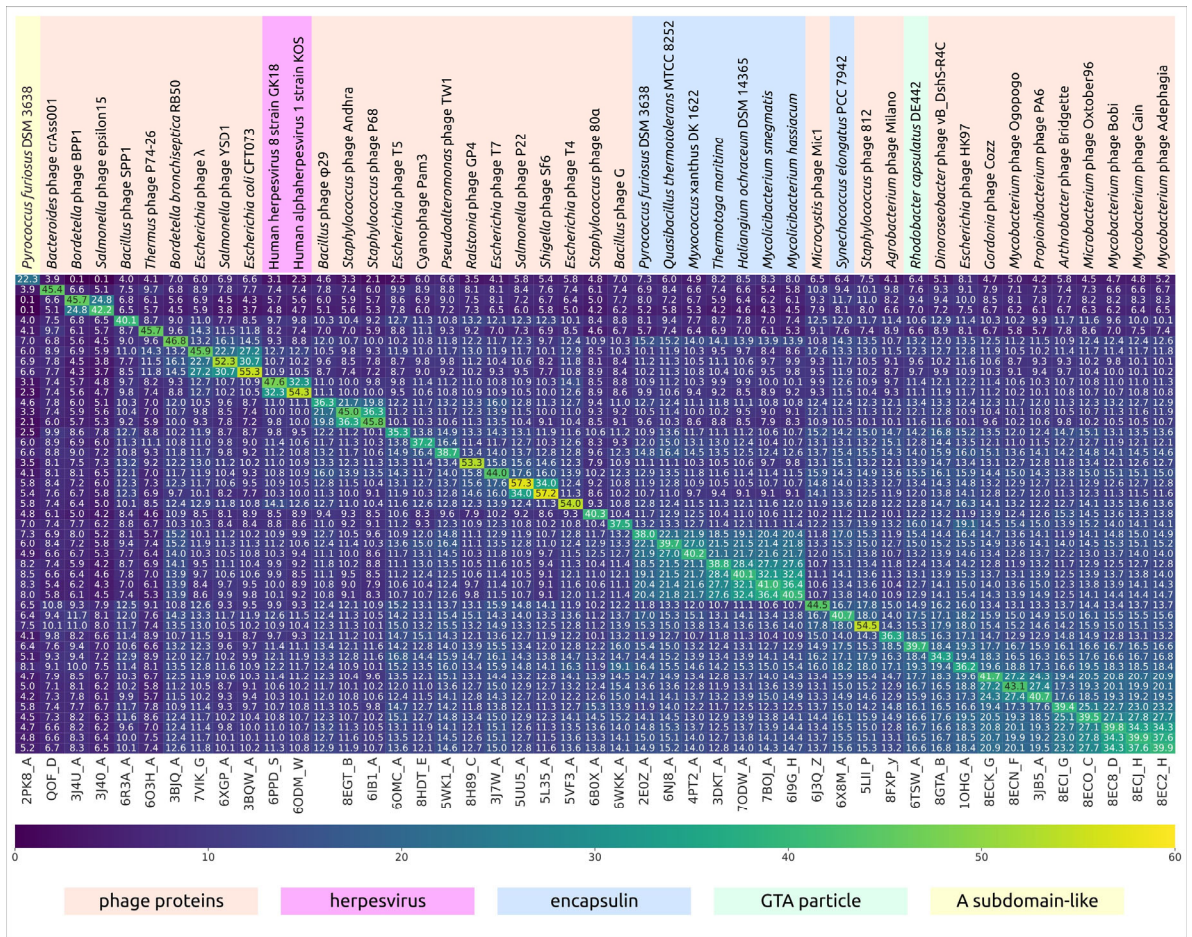

**Figure S4.** Heatmap with numerical values based on the pairwise structural similarity of viral capsid proteins and encapsulin major shell proteins, as measured by DALI Z-scores.

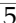

**Figure S5.** Maximum likelihood phylogenetic trees based on amino acid sequences of MCP predicted to be encoded in genomes of isolated  $\phi$ 29-like and related phages. Taxonomy, obtained from the ICTV classification and based on the results of this phylogenetic analysis, is indicated in legends. Branches with a bootstrap support lower than 50% have been deleted. Bootstrap values are shown near their branches. The scale bar shows one estimated substitution per site and the tree was rooted to the midpoint.

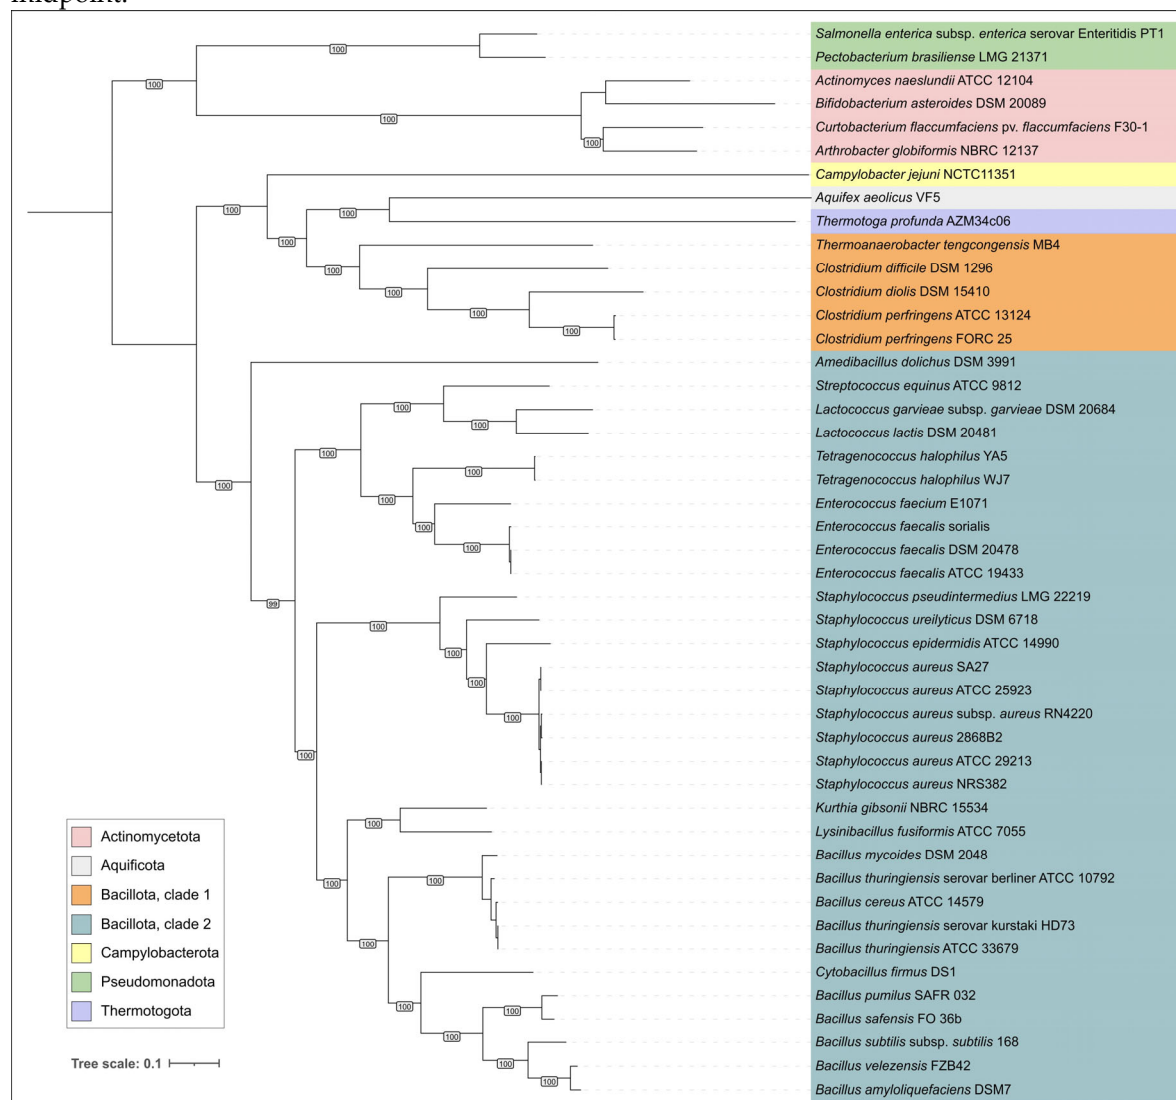

**Figure S6.** Maximum likelihood phylogenetic tree based on concatenated alignments of 81 bacterial core genes [143], extracted from the genomic sequences of bacterial hosts of  $\phi$ 29-like and related phages, as well as other related bacteria. Bacterial taxonomy is indicated in the legend. Branches with a bootstrap support lower than 50% have been deleted. Bootstrap values are shown near their branches. The scale bar shows 0.1 estimated substitutions per site and the tree was rooted to the midpoint.



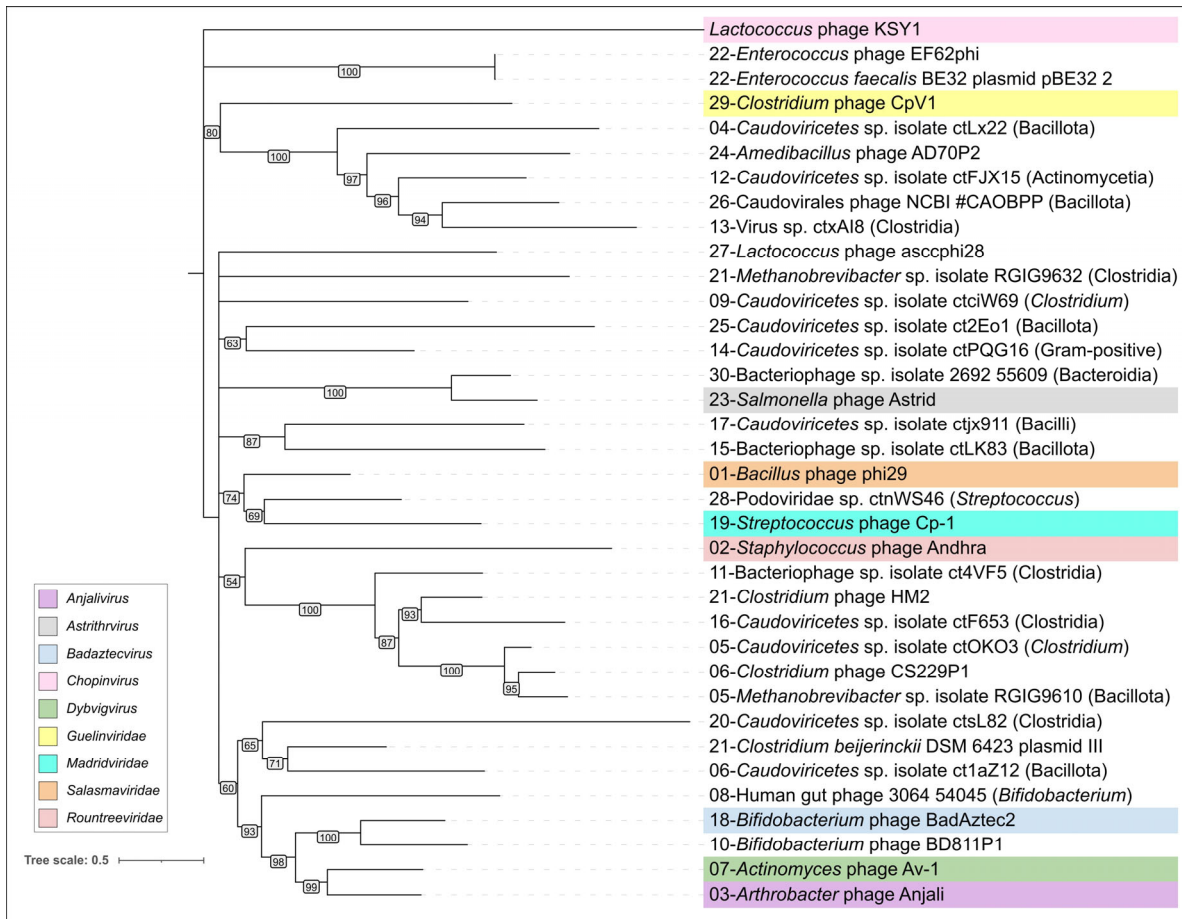

(a)

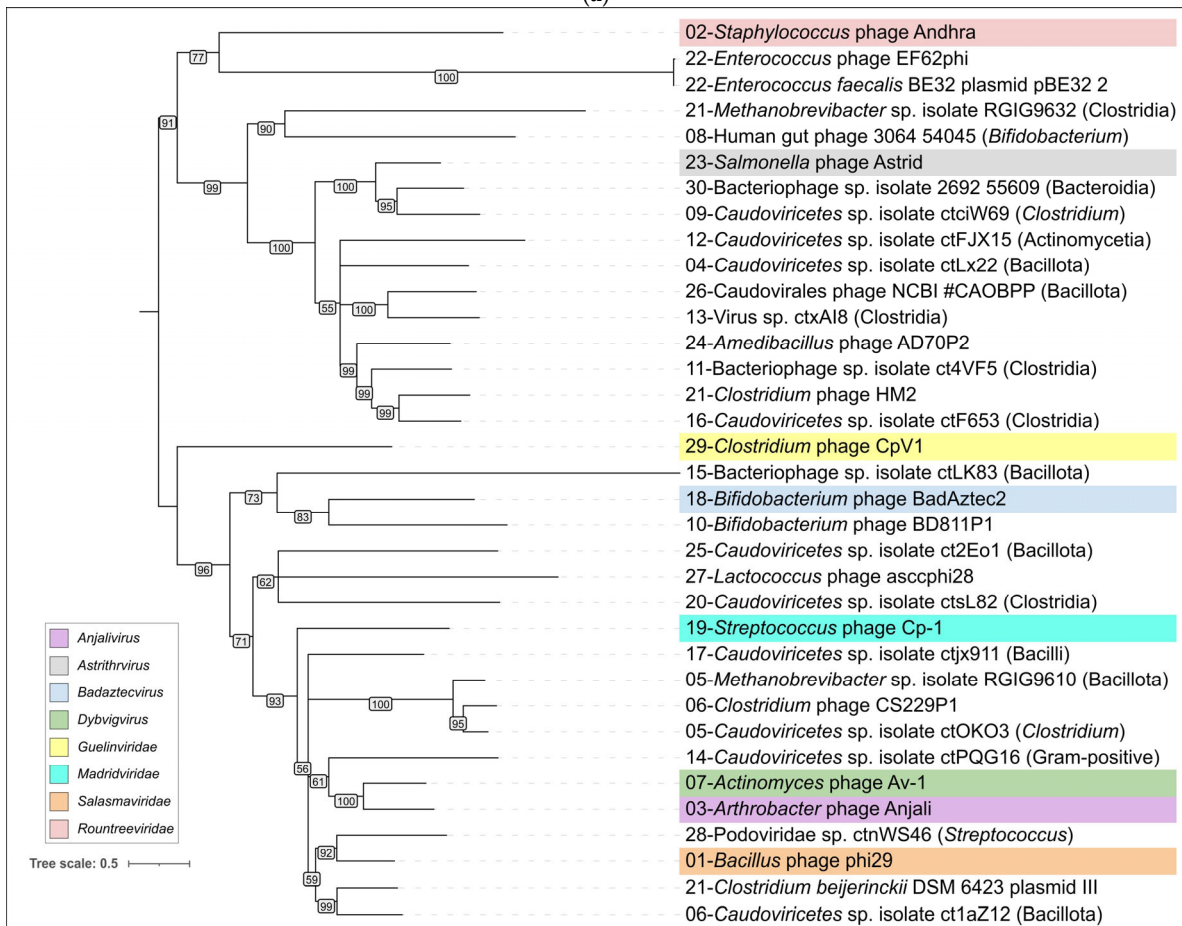

(b)

**Figure S7.** Maximum likelihood phylogenetic trees based on amino acid sequences of Ter (a) and DNAP (b), predicted in sequences representing clusters of  $\phi$ 29-like and related phages. The taxonomy of isolated phages is indicated in legends. Branches with a bootstrap support lower than 50% have been deleted. Bootstrap values are shown near their branches. The scale bar shows 0.5 estimated substitutions per site and the trees were rooted to the midpoint.



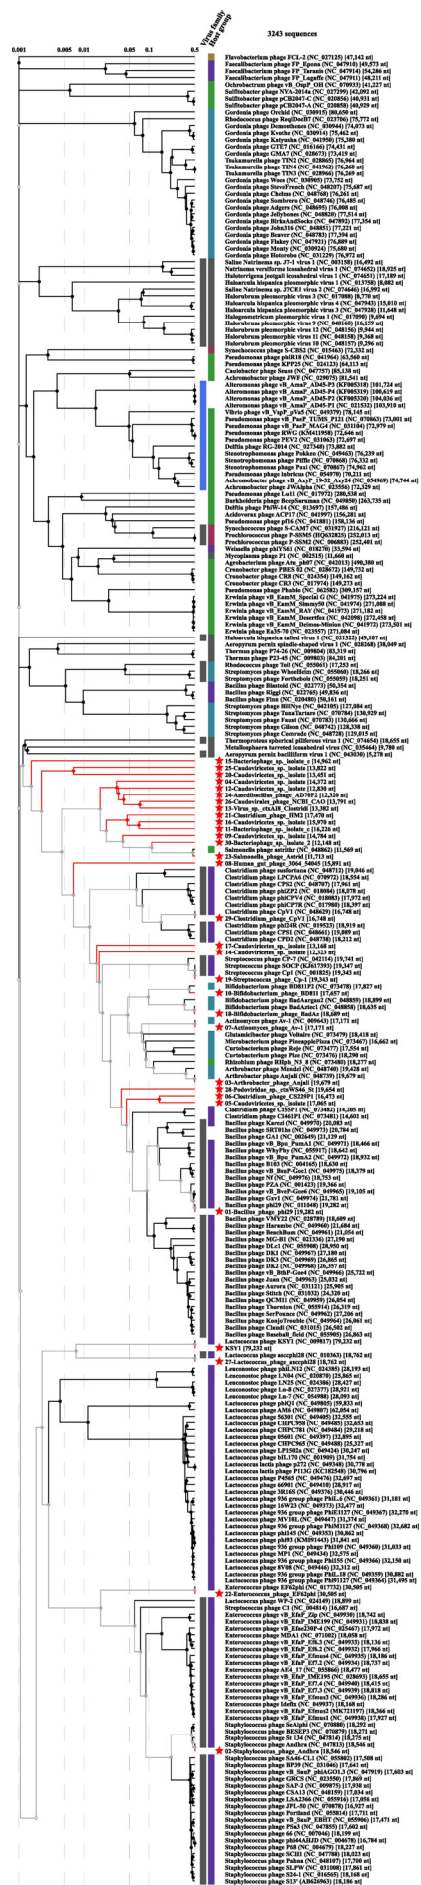

Aligned genome fraction

Genome length ratio

Intergenomic similarity

0 0.25 0.5 0.75 1

0 20 40 50 60 70 80 90 100

27-Lactococcus\_phage\_ascsp128  
Lactococcus\_phage\_KSY1  
09-Caudoviricetes\_sp\_isolate\_ctcW69  
23-Salmonella\_phage\_Astrid  
30-Bacteriophage\_sp\_isolate\_2692\_55609  
02-Staphylococcus\_phage\_Andhra  
02-Staphylococcus\_phage\_S-CoN\_Ph28  
22-Enterococcus\_faecalis\_BE32\_plasmid\_pBE32\_2  
22-Enterococcus\_phage\_EF62phi  
20-Caudoviricetes\_sp\_isolate\_ctsL82  
29-Clostridium\_phage\_CpV1  
19-Streptococcus\_phage\_Cp-1\_DNA  
01-Bacillus\_phage\_phi29  
28-Podoviridae\_sp\_ctnW546  
12-Caudoviricetes\_sp\_isolate\_ctfJX15  
04-Caudoviricetes\_sp\_isolate\_ctLX22  
20-Caudovirales\_phage\_NCBI\_#CAOBPP  
14-Caudoviricetes\_sp\_isolate\_ctPQG16  
25-Caudoviricetes\_sp\_isolate\_ct2Eo1  
21-Methanobrevibacter\_sp\_isolate\_RIGI9632  
21-Clostridium\_phage\_HM2  
24-Ameibacillus\_phage\_AD70P2  
11-Bacteriophage\_sp\_isolate\_ct4VF5  
16-Caudoviricetes\_sp\_isolate\_ctF653  
06-Caudoviricetes\_sp\_isolate\_ct1aZ12  
21-Clostridium\_beijerinckii\_DSM\_6423\_plasmid\_III  
21-Bacteriophage\_sp\_isolate\_ctCvG65  
06-Clostridium\_phage\_CS229P1  
05-Caudoviricetes\_sp\_isolate\_ctOKO3  
05-Methanobrevibacter\_sp\_isolate\_RIGI9610  
08-Human\_gut\_phage\_3064\_54045  
03-Arthrobacter\_phage\_Anjali  
07-Actinomyces\_phage\_Av-1  
10-Bifidobacterium\_phage\_BD811P1  
18-Bifidobacterium\_phage\_BadAztec2  
17-Caudoviricetes\_sp\_isolate\_ctpX911  
13-Virus\_sp\_ctxA18  
15-Bacteriophage\_sp\_isolate\_ctLK83
